# Supplementary material for: An Internet-based emotion regulation intervention versus no intervention for non-suicidal self-injury in adolescents: a statistical analysis plan for a feasibility randomised clinical trial
Source: PubMed Central journal article supplement (PMC8283974; doi:10.1186/s13063-021-05406-2), 2021-07-16
Supplement: 13063_2021_5406_MOESM1_ESM.pdf [file 13063_2021_5406_MOESM1_ESM.pdf]

# Statistical report for TEENS feasibility trial

Using simulated data

14 juni 2021

## Contents

|                                      |          |
|--------------------------------------|----------|
| <b>Baseline characteristics</b>      | <b>2</b> |
| <b>Feasibility outcomes</b>          | <b>3</b> |
| <b>Exploratory clinical outcomes</b> | <b>4</b> |
| DSHI-Y (primary) . . . . .           | 4        |
| Kidscreen-10 (secondary) . . . . .   | 5        |
| DASS-21 (secondary) . . . . .        | 7        |
| Self-injury (secondary) . . . . .    | 10       |
| Sick days (secondary) . . . . .      | 11       |
| DERS-16 (further) . . . . .          | 12       |
| BSL-supplement (further) . . . . .   | 13       |
| CCNES-APP (further) . . . . .        | 14       |
| NEQ (further) . . . . .              | 15       |

## Baseline characteristics

Baseline characteristics

|                               | A            | B            | Overall      |
|-------------------------------|--------------|--------------|--------------|
| n                             | 15           | 15           | 30           |
| Age (mean (SD))               | 16.13 (0.83) | 15.64 (0.50) | 15.90 (0.72) |
| Gender (%)                    |              |              |              |
| Female                        | 6 (40.0)     | 5 (33.3)     | 11 (36.7)    |
| Male                          | 3 (20.0)     | 2 (13.3)     | 5 (16.7)     |
| Other                         | 3 (20.0)     | 3 (20.0)     | 6 (20.0)     |
| Transgender                   | 3 (20.0)     | 5 (33.3)     | 8 (26.7)     |
| Nationality (%)               |              |              |              |
| Danish                        | 4 (26.7)     | 6 (40.0)     | 10 (33.3)    |
| Middle Eastern                | 3 (20.0)     | 6 (40.0)     | 9 (30.0)     |
| Other                         | 5 (33.3)     | 1 ( 6.7)     | 6 (20.0)     |
| Other European/North American | 3 (20.0)     | 2 (13.3)     | 5 (16.7)     |
| School (%)                    |              |              |              |
| Boarding school               | 1 ( 6.7)     | 4 (26.7)     | 5 (16.7)     |
| High-school                   | 3 (20.0)     | 3 (20.0)     | 6 (20.0)     |
| Middle-school                 | 6 (40.0)     | 3 (20.0)     | 9 (30.0)     |
| No school                     | 2 (13.3)     | 2 (13.3)     | 4 (13.3)     |
| Other                         | 3 (20.0)     | 3 (20.0)     | 6 (20.0)     |
| Parental status (%)           |              |              |              |
| Cohabitant                    | 3 (20.0)     | 3 (20.0)     | 6 (20.0)     |
| Divorced                      | 5 (33.3)     | 5 (33.3)     | 10 (33.3)    |
| Married                       | 4 (26.7)     | 2 (13.3)     | 6 (20.0)     |
| Other                         | 3 (20.0)     | 5 (33.3)     | 8 (26.7)     |

Missing data: Age: 3.3 %

## Feasibility outcomes

### A) Completion of follow-up

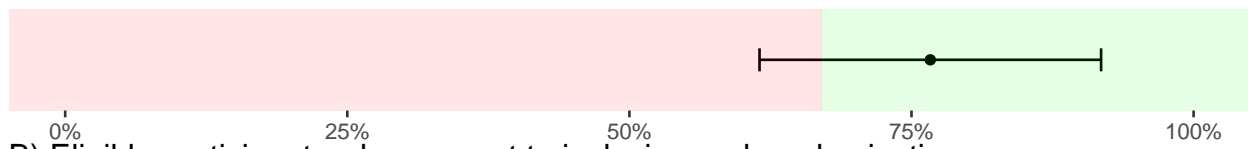

### B) Eligible participants who consent to inclusion and randomisation

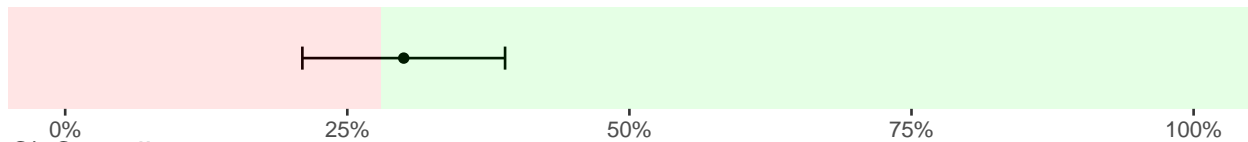

### C) Compliance

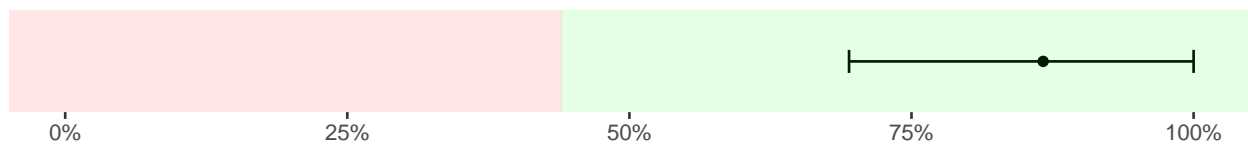

| Outcome                                                             | Requirement | Fraction | LCL | UCL  |
|---------------------------------------------------------------------|-------------|----------|-----|------|
| A) Completion of follow-up                                          | 68%         | 77%      | 62% | 92%  |
| B) Eligible participants who consent to inclusion and randomisation | 29%         | 30%      | 21% | 39%  |
| C) Compliance                                                       | 45%         | 87%      | 69% | 100% |

# Exploratory clinical outcomes

## DSHI-Y (primary)

Data on non-suicidal self-injury (NSSI) as measured by DSHI-Y will be obtained in both groups at baseline and follow-up, and during the intervention for the interventional group. DSHI-Y reflects the number of NSSI events in the past month. The results will be presented as one sum score.

### Results

Summarised results

|                    | A<br>mean (SD) [n]   | B<br>mean (SD) [n]   | Overall         |
|--------------------|----------------------|----------------------|-----------------|
| n                  | 15                   | 15                   | 30              |
| DSHI-Y (baseline)  | 210.93 (126.99) [15] | 208.33 (107.99) [15] | 209.63 (115.83) |
| DSHI-Y (follow-up) | 183.47 (127.14) [15] | 171.00 (134.16) [15] | 177.23 (128.58) |

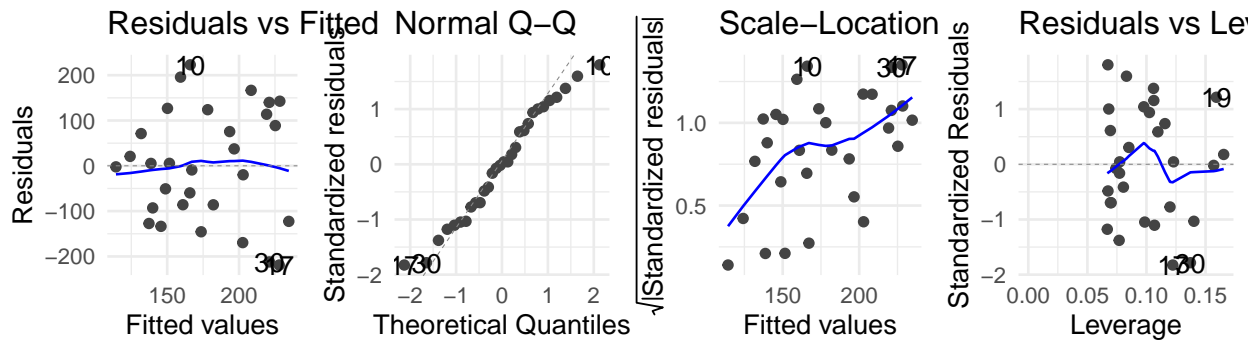

A

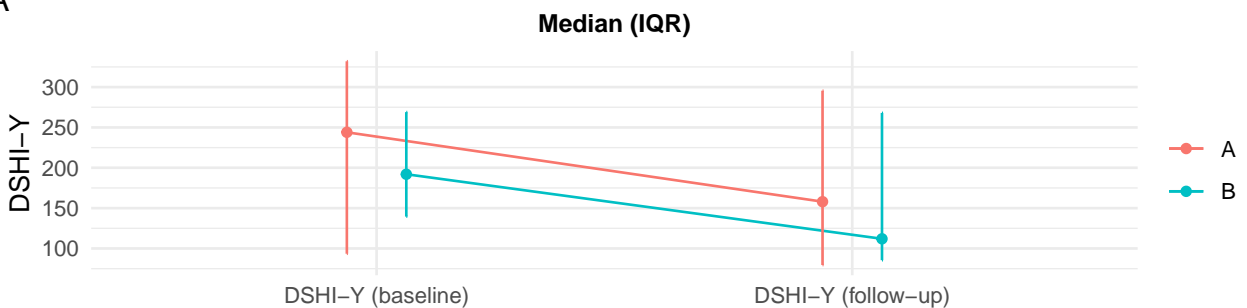

Linear regression

|        | p-value |
|--------|---------|
| DSHI-Y | 0.80463 |

## Kidscreen-10 (secondary)

Data on Kidscreen-10 will be obtained in both groups at baseline and follow-up. Kidscreen-10 has 10 items which each generates a score from 1 to 5. The sum of the raw scores will be processed using the algorithm below:

- $RASCH\ PP = (10 = -4.327) / (11 = -3.206) / (12 = -2.675) / (13 = -2.319) / (14 = -2.049) / (15 = -1.831) / (16 = -1.645) / (17 = -1.483) / (18 = -1.339) / (19 = -1.207) / (20 = -1.085) / (21 = -0.971) / (22 = -0.863) / (23 = -0.760) / (24 = -0.660) / (25 = -0.563) / (26 = -0.468) / (27 = -0.374) / (28 = -0.281) / (29 = -0.187) / (30 = -0.093) / (31 = 0.002) / (32 = 0.100) / (33 = 0.199) / (34 = 0.302) / (35 = 0.409) / (36 = 0.520) / (37 = 0.637) / (38 = 0.760) / (39 = 0.891) / (40 = 1.031) / (41 = 1.183) / (42 = 1.348) / (43 = 1.529) / (44 = 1.732) / (45 = 1.961) / (46 = 2.226) / (47 = 2.545) / (48 = 2.951) / (49 = 3.533) / (50 = 4.703)$

(points = sub-score)

The results are presented using two scales:

- General HRQoL index = RASCH PP
- General HRQoL index European T-values =  $((RASCH\ PP - 1.2078) / 1.03377) * 10 + 50$

## Results

Summarised results

|                                   | A<br>mean (SD) [n] | B<br>mean (SD) [n] | Overall       |
|-----------------------------------|--------------------|--------------------|---------------|
| n                                 | 15                 | 15                 | 30            |
| Kidscreen-10 T-values (baseline)  | 62.43 (9.51) [14]  | 58.19 (12.19) [15] | 60.23 (11.00) |
| Kidscreen-10 T-values (follow-up) | 20.45 (11.54) [14] | 19.05 (12.83) [15] | 19.72 (12.03) |

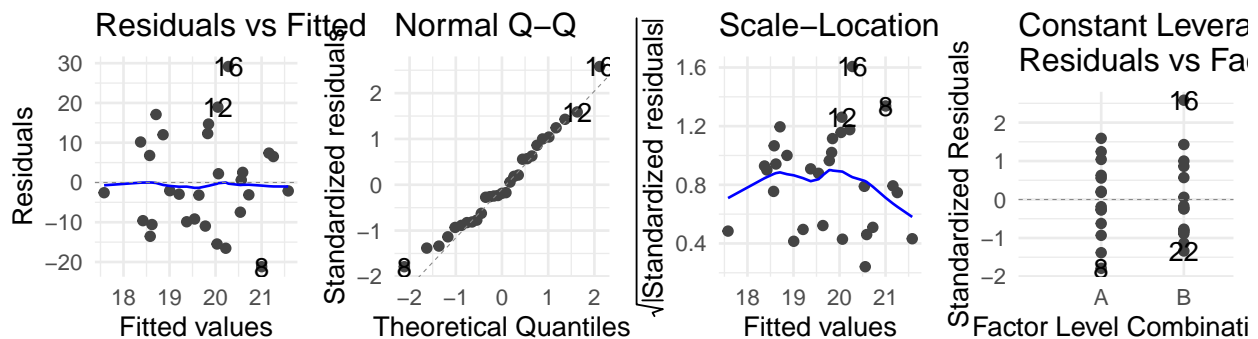

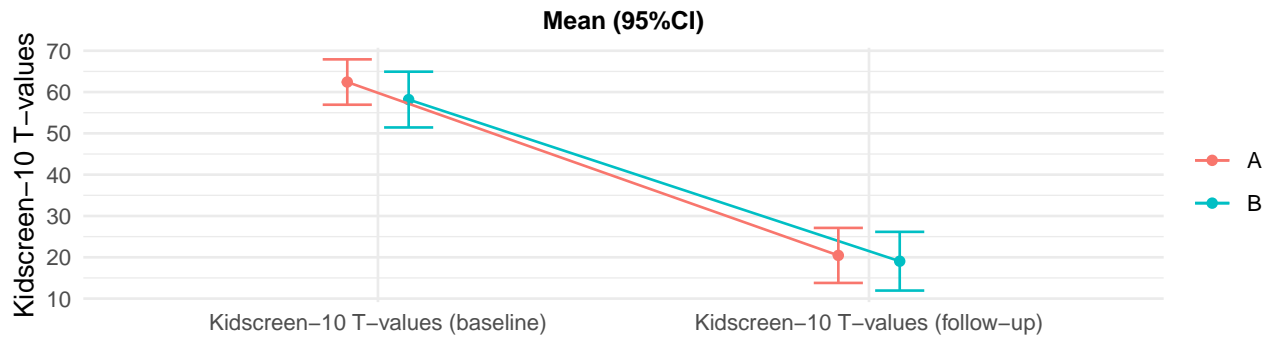

Linear regression

|                       | p-value |
|-----------------------|---------|
| Kidscreen-10 T-values | 0.72449 |

## DASS-21 (secondary)

Data on DASS-21 will be obtained in both groups at baseline and follow-up. DASS-21 has 21 items which each generates a score from 0 to 3. The results will be presented as sum-score for the following three subscales:

- **Depression** = I3 + I5 + I10 + I13 + I16 + I17 + I21
- **Anxiety** = I2 + I4 + I7 + I9 + I15 + I19 + I20
- **Stress** = I1 + I6 + I8 + I11 + I12 + I14 + I18

*I: Items*

## Results

Summarised results

|                                | A<br>mean (SD) [n] | B<br>mean (SD) [n] | Overall      |
|--------------------------------|--------------------|--------------------|--------------|
| n                              | 15                 | 15                 | 30           |
| DASS-21 Depression (baseline)  | 10.00 (6.08) [15]  | 11.13 (6.57) [15]  | 10.57 (6.25) |
| DASS-21 Anxiety (baseline)     | 8.60 (5.65) [15]   | 13.27 (5.78) [15]  | 10.93 (6.10) |
| DASS-21 Stress (baseline)      | 11.07 (6.89) [15]  | 10.87 (5.01) [15]  | 10.97 (5.92) |
| DASS-21 Depression (follow-up) | 9.00 (6.35) [15]   | 10.33 (6.50) [15]  | 9.67 (6.35)  |
| DASS-21 Anxiety (follow-up)    | 10.20 (7.22) [15]  | 9.20 (5.94) [15]   | 9.70 (6.52)  |
| DASS-21 Stress (follow-up)     | 9.33 (7.83) [15]   | 10.27 (7.05) [15]  | 9.80 (7.33)  |

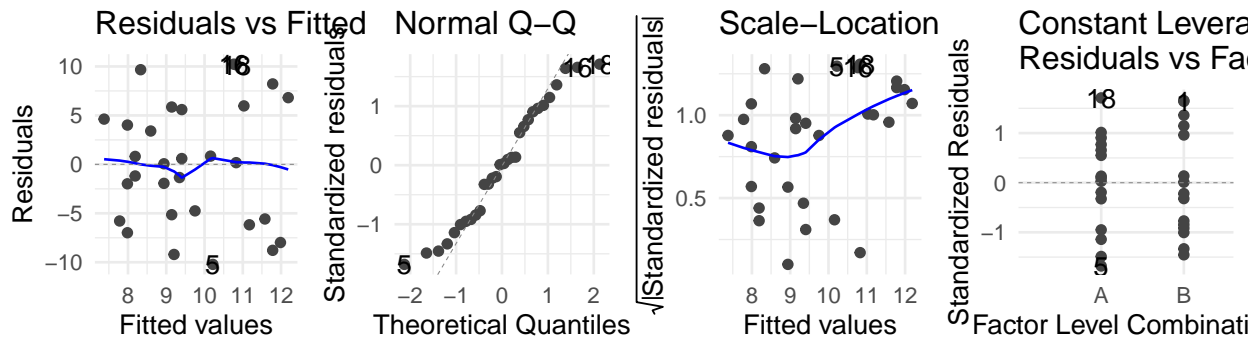

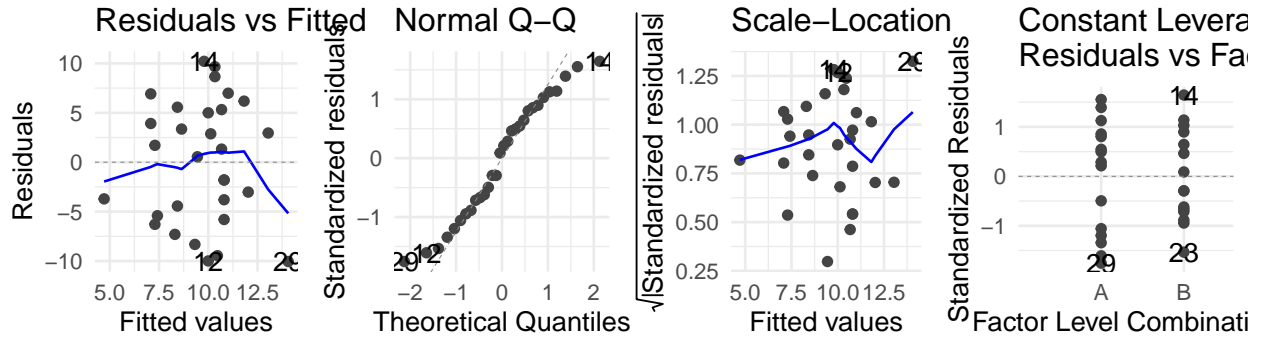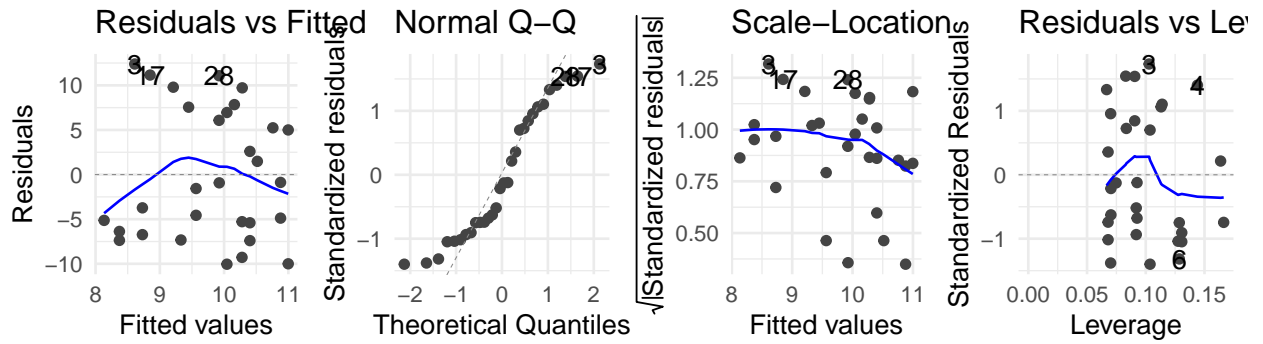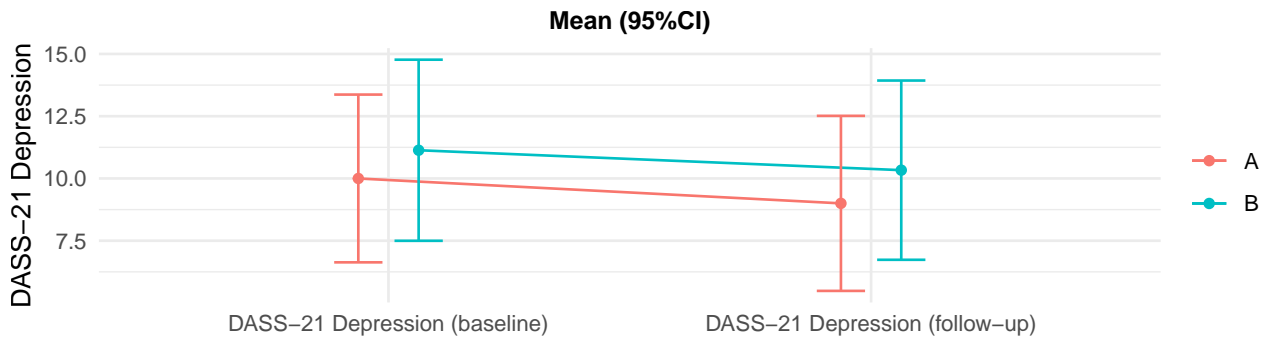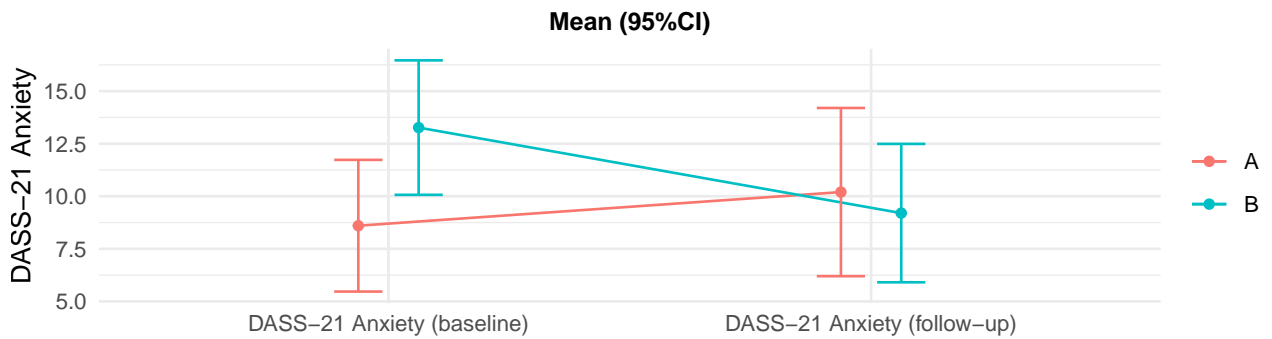



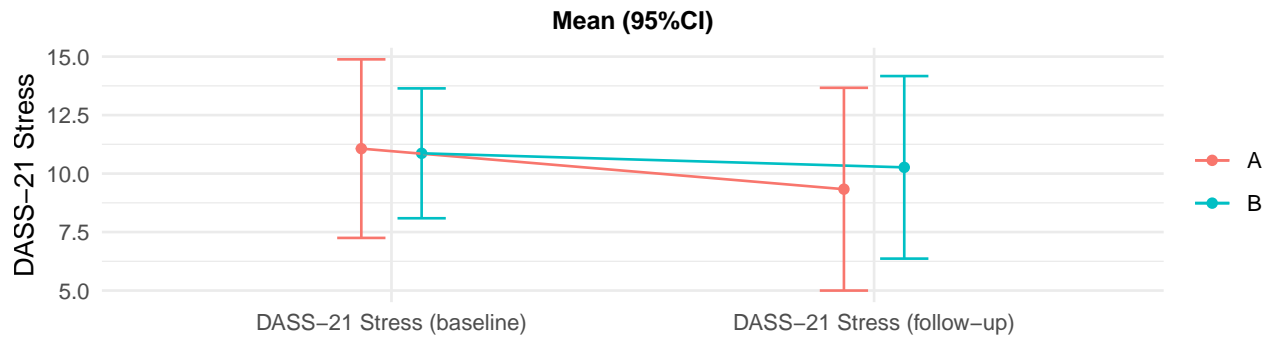

Linear regression

|                    | p-value |
|--------------------|---------|
| DASS-21 Depression | 0.51159 |
| DASS-21 Anxiety    | 0.32147 |
| DASS-21 Stress     | 0.73107 |

## Self-injury (secondary)

Data on 'Self-injury' will be obtained in both groups only at follow-up. 'Self-injury' is answered as either 'yes' or 'no'.

| Summarised results    | Summarised results |               | Summarised results |      |       |
|-----------------------|--------------------|---------------|--------------------|------|-------|
|                       | A                  | B             | Overall            |      |       |
|                       | N (%) [n]          | N (%) [n]     |                    |      |       |
| n                     | 15                 |               | 30                 |      |       |
| Self-injury = Yes (%) | 8 (53.3) [15]      | 9 (60.0) [15] | 17 (56.7)          |      |       |
|                       |                    |               |                    |      |       |
|                       | var                | R             | lcl                | ucl  | p     |
| Self-injury           | OR                 | 1.31          | 0.31               | 5.75 | 0.713 |
| Self-injury           | RR                 | 1.12          | 0.60               | 2.11 |       |

**NB:** Confidence intervals of RR are *Unconditional MLE & normal approximation (Wald) CI*, while the confidence intervals for RR will be obtained using marginal effects.

## Sick days (secondary)

Data on ‘Sick days’ will be obtained in both groups at baseline and follow-up. ‘Sick days’ will be presented as a ratio, where 0 refers to full student capacity.

Summarised results

|                       | A<br>mean (SD) [n] | B<br>mean (SD) [n] | Overall     |
|-----------------------|--------------------|--------------------|-------------|
| n                     | 15                 | 15                 | 30          |
| Sick days (baseline)  | 0.59 (0.29) [15]   | 0.44 (0.22) [15]   | 0.51 (0.26) |
| Sick days (follow-up) | 0.52 (0.22) [15]   | 0.48 (0.26) [15]   | 0.50 (0.24) |

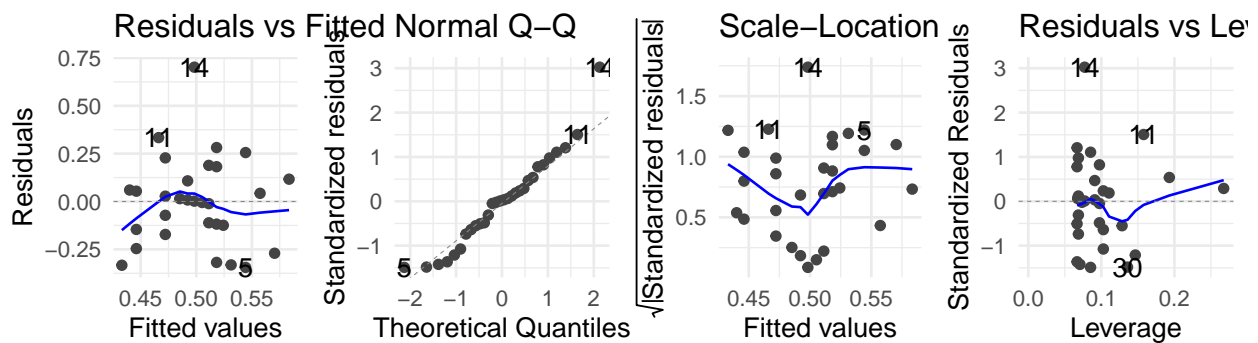

A

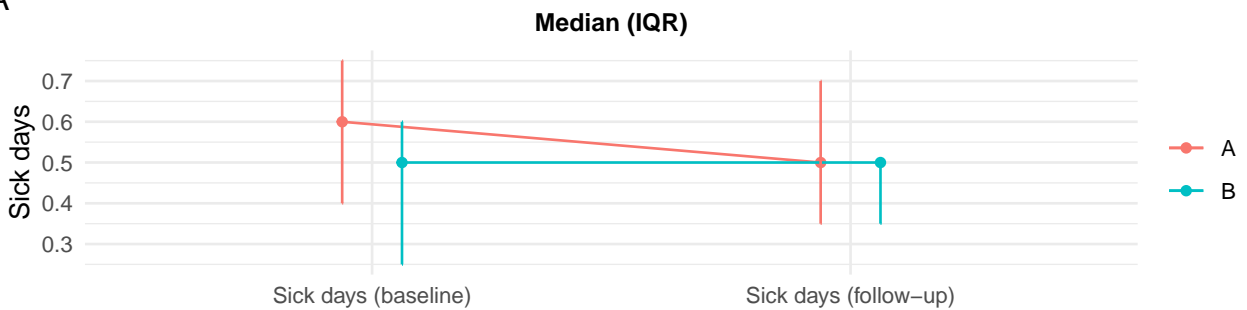

Linear regression

|           | p-value |
|-----------|---------|
| Sick days | 0.52578 |

## DERS-16 (further)

Data on DERS-16 will be obtained in both groups at baseline and follow-up, and during the intervention for the interventional group. DERS-16 has 16 items which each generates a score from 1 to 5. The results will be presented as one sum-score. The scores in this scale range from 16-80 with higher scores indicating greater emotion regulation difficulties.

### Results

Summarised results

|                     | A<br>mean (SD) [n] | B<br>mean (SD) [n] | Overall       |
|---------------------|--------------------|--------------------|---------------|
| n                   | 15                 | 15                 | 30            |
| DERS-16 (baseline)  | 54.53 (19.25) [15] | 48.00 (16.82) [15] | 51.27 (18.07) |
| DERS-16 (follow-up) | 37.33 (21.02) [15] | 46.40 (18.70) [15] | 41.87 (20.09) |

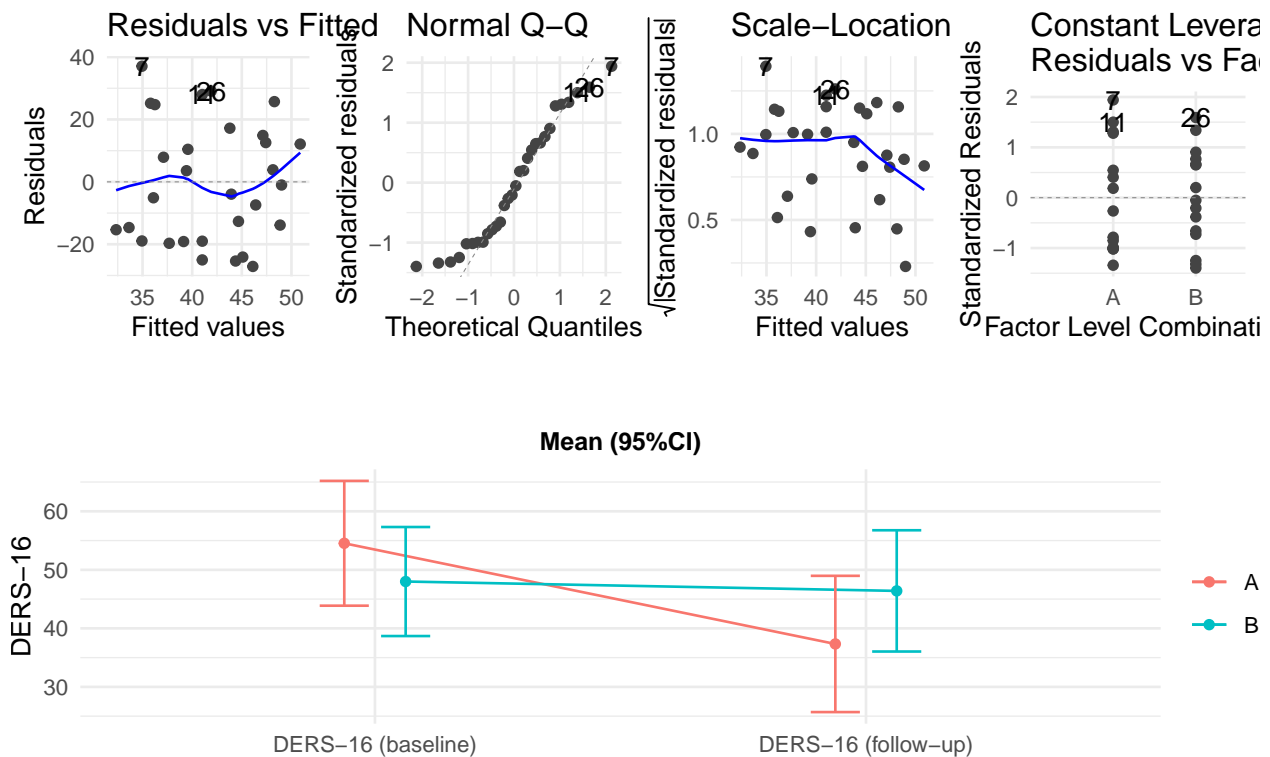

Linear regression

|         | p-value |
|---------|---------|
| DERS-16 | 0.19082 |

## BSL-supplement (further)

Data on BSL-supplement will be obtained in both groups at baseline and follow-up, and during the intervention for the interventional group. BSL-supplement has 11 items which each generates a score from 0 to 4. The results will be presented as one sum-score.

## Results

Summarised results

|                            | A<br>mean (SD) [n] | B<br>mean (SD) [n] | Overall       |
|----------------------------|--------------------|--------------------|---------------|
| n                          | 15                 | 15                 | 30            |
| BSL-supplement (baseline)  | 19.80 (13.99) [15] | 24.20 (14.97) [15] | 22.00 (14.41) |
| BSL-supplement (follow-up) | 18.60 (14.68) [15] | 16.27 (13.08) [15] | 17.43 (13.72) |

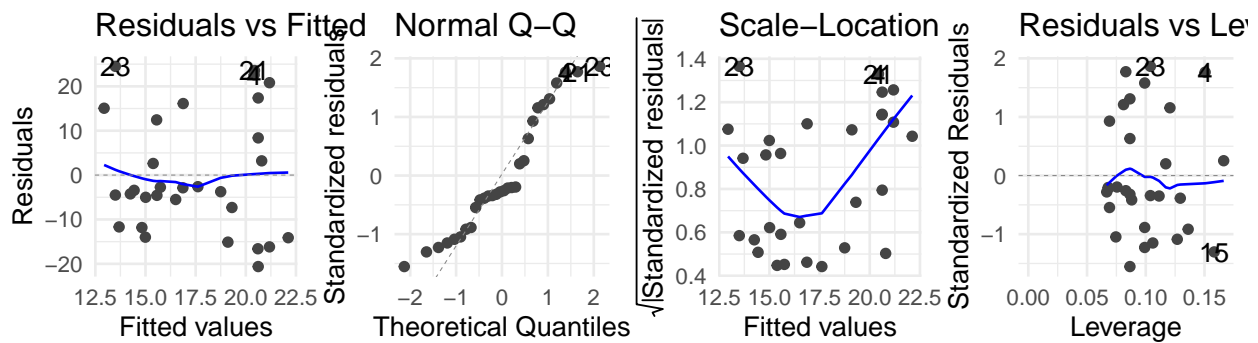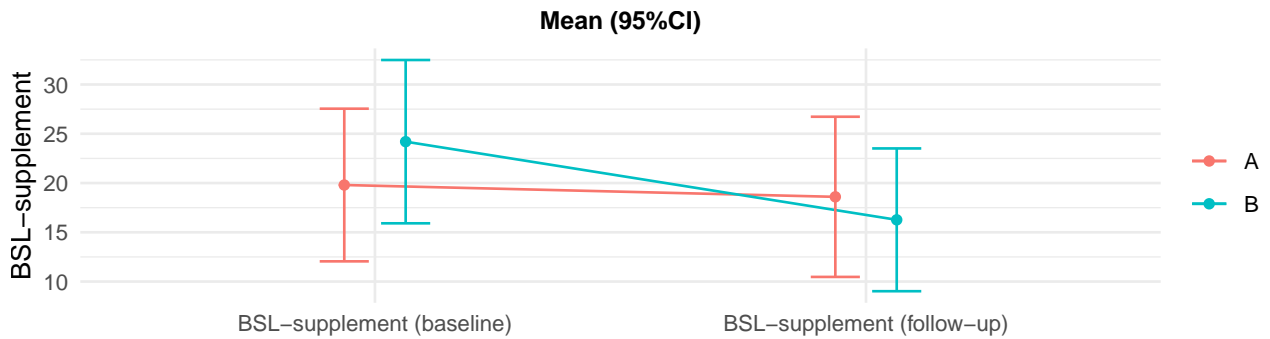

Linear regression

|                | p-value |
|----------------|---------|
| BSL-supplement | 0.77085 |

## CCNES-APP (further)

Data on CCNES-APP will be obtained from the participants in both groups only at follow-up. CCNES-APP has 9 main items with 6 sub items (a to f) for each. Each sub item generates a score from 1 to 7. The results will be presented as mean-scores for the following six subscales:

- **Distress reaction** = ( I1a + I2d + I3f + I4d + I5a + I6b + I7f + I8a + I9d ) / 9
- **Punitive reactions** = ( I1e + I2f + I3b + I4c + I5e + I6c + I7b + I8e + I9c ) / 9
- **Expressive encouragement** = ( I1b + I2c + I3e + I4f + I5b + I6d + I7e + I8b + I9e ) / 9
- **Emotion-focused reactions** = ( I1c + I2b + I3c + I4a + I5c + I6f + I7d + I8c + I9a ) / 9
- **Problem-focused reactions** = ( I1f + I2e + I3a + I4b + I5f + I6e + I7a + I8f + I9b ) / 9
- **Minimization reactions** = ( I1d + I2a + I3d + I4e + I5d + I6a + I7c + I8d + I9f ) / 9

*I: Items*

## Results

Summarised results

|                                                 | A<br>mean (SD) [n] | B<br>mean (SD) [n] | Overall     |
|-------------------------------------------------|--------------------|--------------------|-------------|
| n                                               | 15                 | 15                 | 30          |
| CCNES-APP Distress reaction (follow-up)         | 3.39 (1.06) [15]   | 3.33 (0.77) [15]   | 3.36 (0.91) |
| CCNES-APP Punitive reactions (follow-up)        | 3.79 (0.85) [15]   | 4.23 (0.79) [15]   | 4.01 (0.84) |
| CCNES-APP Expressive encouragement (follow-up)  | 3.67 (1.25) [15]   | 3.91 (1.08) [15]   | 3.79 (1.16) |
| CCNES-APP Emotion-focused reactions (follow-up) | 3.52 (0.90) [15]   | 3.87 (1.19) [15]   | 3.69 (1.05) |
| CCNES-APP Problem-focused reactions (follow-up) | 3.86 (1.28) [15]   | 3.78 (0.92) [15]   | 3.82 (1.10) |
| CCNES-APP Minimization reactions (follow-up)    | 3.41 (1.20) [15]   | 3.56 (0.83) [15]   | 3.49 (1.02) |

Mann-Whitney U test

|                           | Estimate (95% Confidence interval) | p-value |
|---------------------------|------------------------------------|---------|
| Distress reaction         | 0.3 (-0.4-0.8)                     | 0.3825  |
| Punitive reactions        | -0.5 (-1-0.2)                      | 0.2124  |
| Expressive encouragement  | -0.2 (-1-0.6)                      | 0.5192  |
| Emotion-focused reactions | -0.3 (-1-0.5)                      | 0.406   |
| Problem-focused reactions | 0.2 (-0.9-1.1)                     | 0.7082  |
| Minimization reactions    | -0.2 (-0.9-0.6)                    | 0.6629  |

## NEQ (further)

Data on NEQ will be obtained in both groups only at follow-up. NEQ has 20 items, with 5 sub-items. The results will be presented as means and standard deviations:

- **Frequency negative effects** = I1a + I2a + I3a + I4a + I5a + I6a + I7a + I8a + I9a + I10a + I11a + I12a + I13a + I14a + I15a + I16a + I17a + I18a + I19a + I20a (*Score from 0 to 1*)

### Summarised results

|                            | A<br>mean (SD) [n] | B<br>mean (SD) [n] | Overall     |
|----------------------------|--------------------|--------------------|-------------|
| n                          | 15                 | 15                 | 30          |
| NEQ Freq. negative effects | 8.40 (6.14) [15]   | 9.53 (5.59) [15]   | 8.97 (5.80) |

### Mann-Whitney U test

|                            | Estimate (95% Confidence interval) | p-value |
|----------------------------|------------------------------------|---------|
| NEQ Freq. negative effects | -1 (-6-3)                          | 0.5465  |
